# Supplementary material
Source: HighWire-hosted journal article supplement (https://rmdopen.bmj.com/content/8/2/e002270)

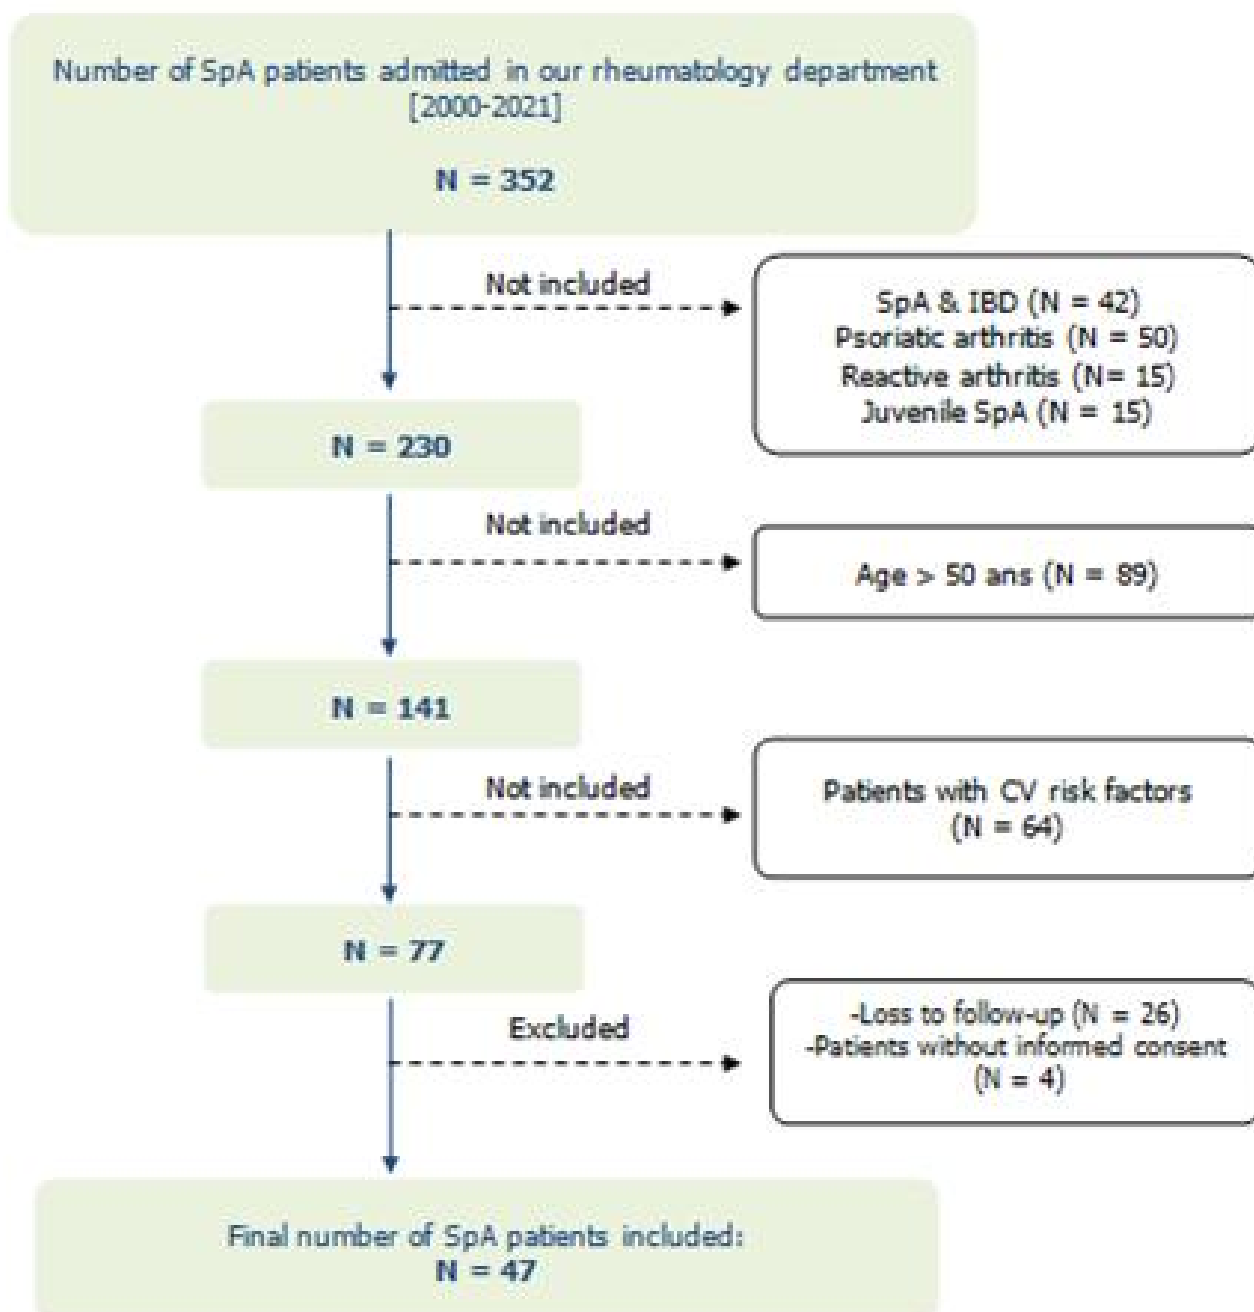

SpA : Spondyloarthritis; N: Number; CV: cardiovascular;

Supplement: inline-supplementary-material-1 [file inline-supplementary-material-1.pdf]
